# Supplementary material for: Health disparities and treatment approaches in portopulmonary hypertension and idiopathic pulmonary arterial hypertension: an analysis of the Pulmonary Hypertension Association Registry
Source: PubMed Central journal article supplement — Pulm Circ. 2021 May 17;11(3):20458940211020913. doi: 10.1177/20458940211020913 (PMC8186121; doi:10.1177/20458940211020913), 2021-05-17
Supplement: sj-pdf-1-pul-10.1177_20458940211020913.pdf [file sj-pdf-1-pul-10.1177_20458940211020913.pdf]

**Supplemental Table 1. Variables associated with use of parenteral therapy in unadjusted analysis**

|                                | <b>No parenteral</b> | <b>Parenteral</b> | <b>P</b> |
|--------------------------------|----------------------|-------------------|----------|
| <b>Age</b>                     | 57.7 ± 15.2          | 46.2 ± 16.5       | <0.001   |
| <b>Race/ethnicity</b>          |                      |                   | 0.0008   |
| Non-Hispanic White             | 217 (71.4)           | 65 (69.2)         |          |
| Hispanic                       | 12 (4.0)             | 10 (10.6)         |          |
| Black or African-American      | 43 (14.1)            | 3 (3.2)           |          |
| Asian/Pacific Islander         | 9 (3.0)              | 2 (2.1)           |          |
| Other/Mixed Race               | 23 (7.6)             | 14 (14.9)         |          |
| <b>Marital status</b>          |                      |                   | 0.02     |
| Single                         | 44 (14.7)            | 23 (25.3)         |          |
| Widowed, divorced or separated | 76 (25.4)            | 13 (14.3)         |          |
| Married or living with partner | 179 (59.9)           | 55 (60.4)         |          |
